# Supplementary material
Source: PubMed Central journal article supplement (PMC5038295)

Molecular epidemiology of vancomycin-intermediate heteroresistant coagulase negative *Staphylococcus* outbreak in the neonatal intensive care unit

Jasmine Chong, Caroline Quach, Ana C. Blanchard, Philippe Guillaume Poliquin,  
George R. Golding Céline Laferrière, Simon Lévesque

Figure S1. Relatedness of the PFGE pattern for the 119 *S. epidermidis* isolates.  
Information about MLST type and vancomycin-intermediate heteroresistance status were  
also included. Y= yes, N= No.

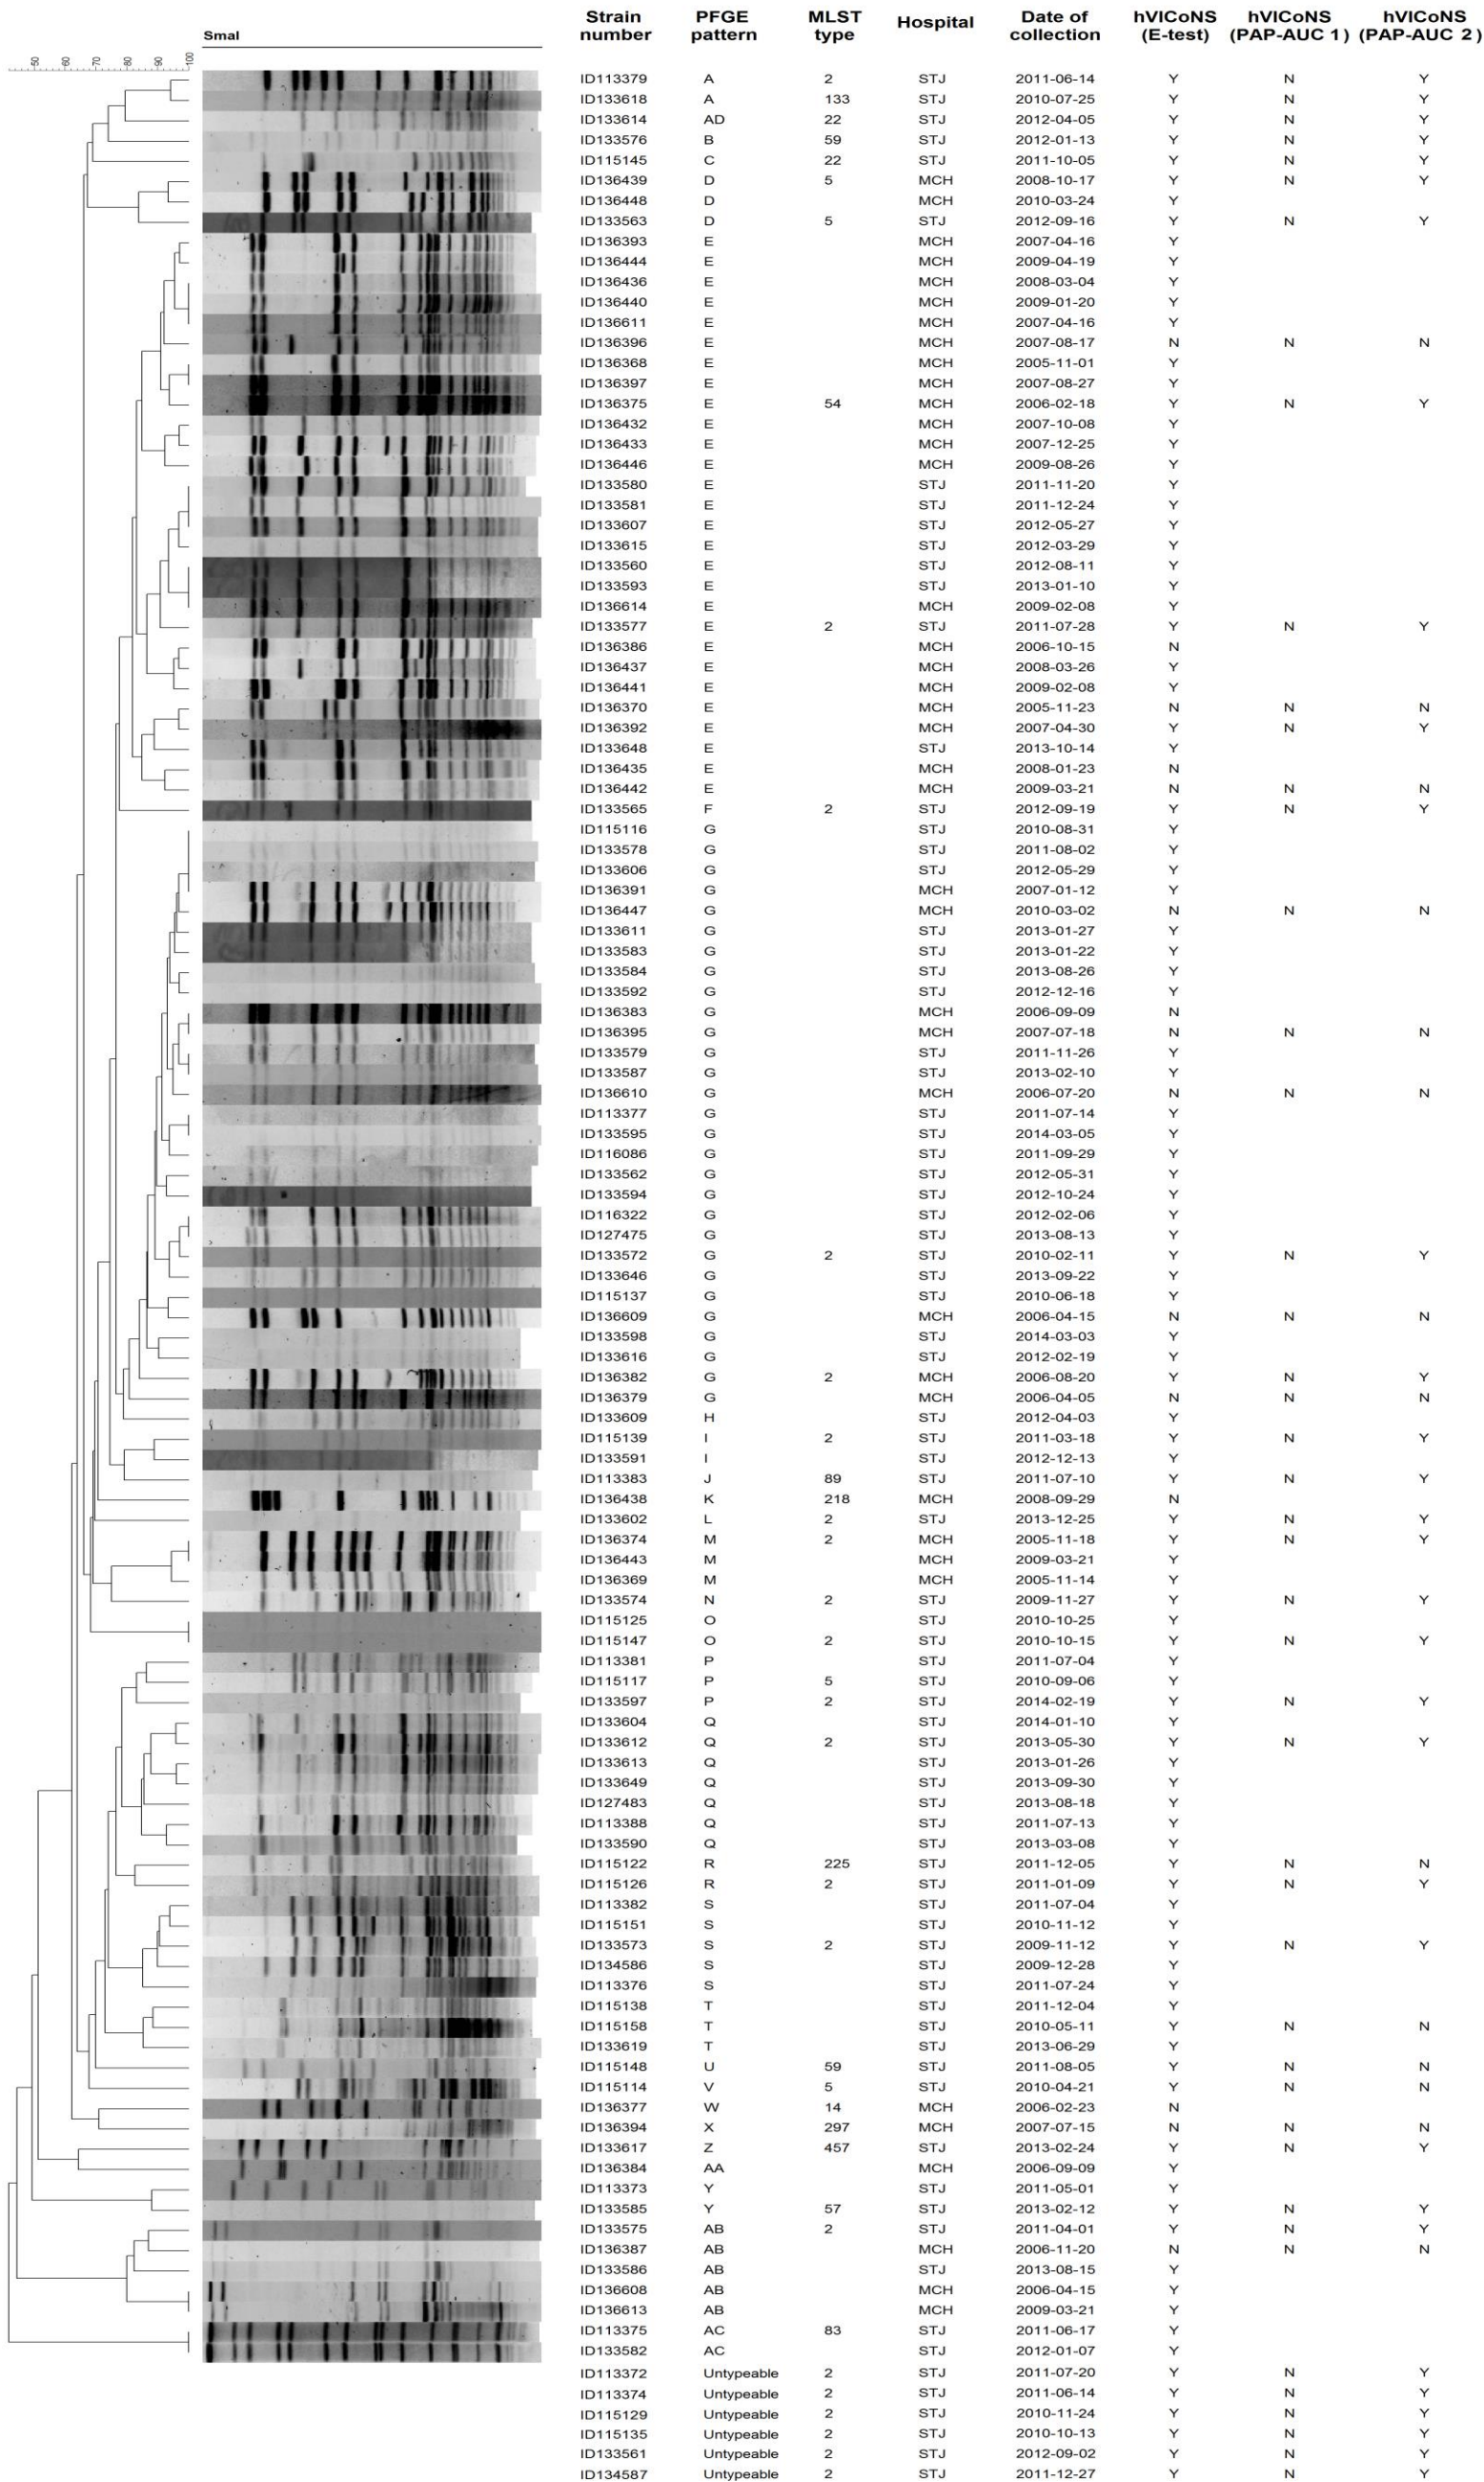

Supplement: AAC.00726-16_zac010165518so1.pdf [file AAC.00726-16_zac010165518so1.pdf]
